# Supplementary material for: Direct Z-scheme of n-type CuS/p-type ZnS@electrospun PVP nanofiber for the highly efficient catalytic reduction of 4-nitrophenol and mixed dyes
Source: Royal Society of Chemistry journal article supplement (doi:10.1039/d2ra01476a), 2022-01-01
Supplement: d2ra01476a1.pdf [file d2ra01476a1.pdf]

**Direct Z-Scheme of n-type CuS/p-type ZnS@Electrospun PVP Nanofiber  
for Highly Efficient Catalytic Reduction of 4-Nitrophenol and Mixed-Dyes**

**Elvri Melliaty Sitinjak<sup>a</sup>, Indra Masmur<sup>b\*</sup>, Vita Mey Destty Marbun<sup>c</sup>, Poltak  
Evencus Hutajulu<sup>c</sup>, Golfrid Gultom<sup>d</sup>, and Yenny Sitanggang<sup>a</sup>**

<sup>a</sup>Department of Chemical Engineering, Politeknik Teknologi Kimia Industri, Medan-20228,  
Indonesia

<sup>b</sup>Department of Chemistry, Faculty of Mathematics and Natural Sciences, Universitas  
Sumatera Utara, Medan-20155, Indonesia

<sup>c</sup>Department of Palm Oil Agribusiness, Politeknik Teknologi Kimia Industri, Medan-20228,  
Indonesia

<sup>d</sup>Department of Mechanical Engineering, Politeknik Teknologi Kimia Industri, Medan-20228,  
Indonesia

\*Corresponding author: intar76@yahoo.com

## Supplementary Information

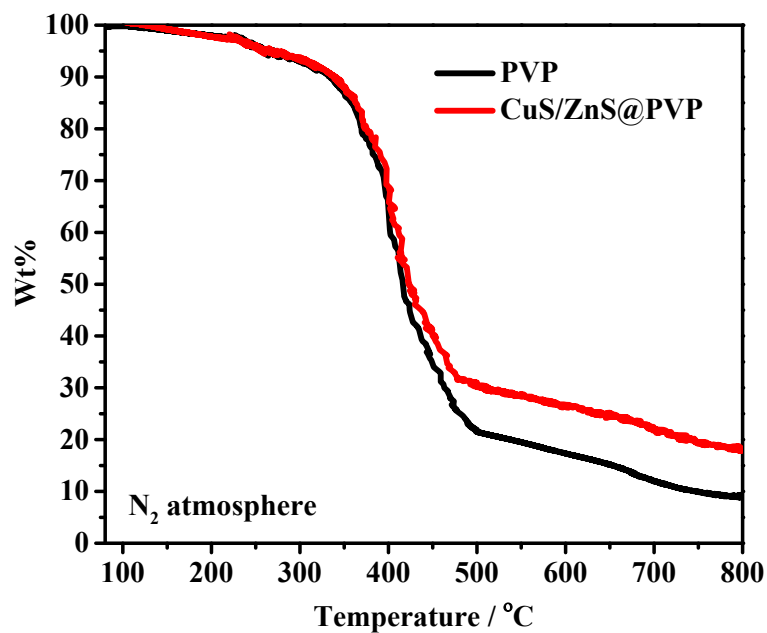

**Fig. S1** TGA curves of PVP (black line) and CuS/ZnS@PVP nanofibers (red line) under N<sub>2</sub> atmosphere.

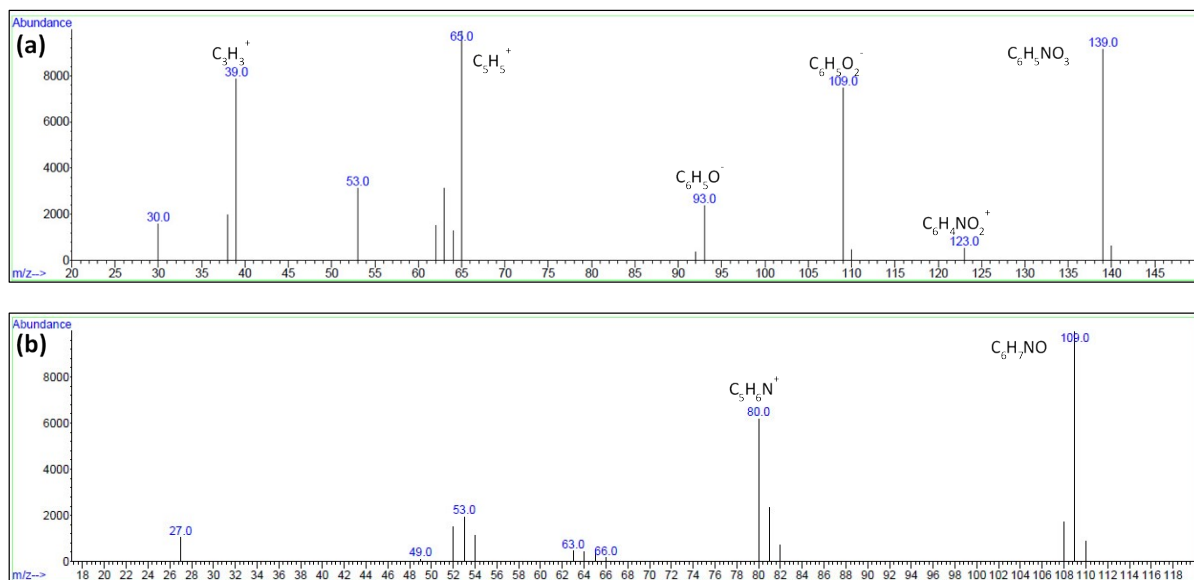

**Fig. S2** The GC-MS chromatogram of (a) before and (b) after photocatalytic reduction of 4-nitrophenol for 2 h with methanol as the hole scavenger.

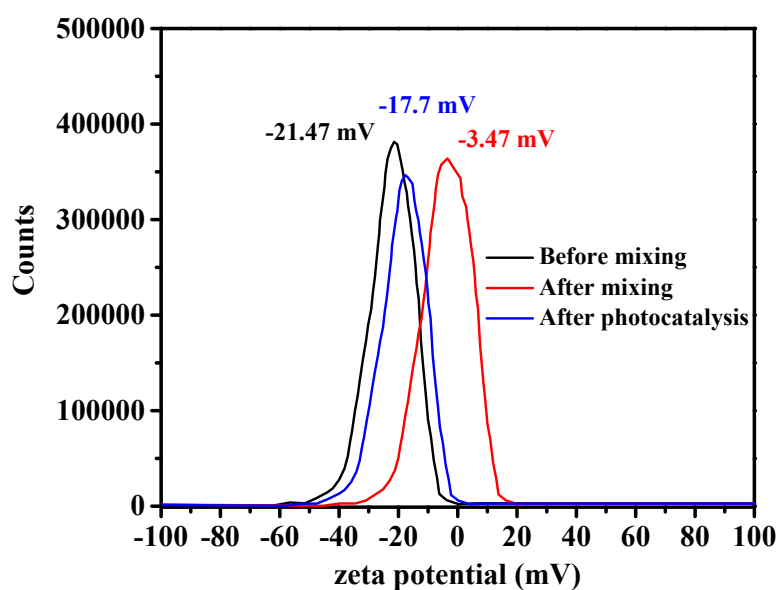

**Fig. S3** Zeta potential CuS/ZnS@PVP nanofiber for sample (a) before mixing, (b) after mixing with mixed-dyes, and (c) after photocatalysis.

**Table S1.** The concentration of each dye during photocatalytic degradation in mixed-dyes by CuS/ZnS@PVP nanofiber

| Time (min) | $C_t/C_0$      |             |               |
|------------|----------------|-------------|---------------|
|            | Methylene blue | Rhodamine B | Methyl Orange |
| -30        | 1              | 1           | 1             |
| -15        | 0.73           | 0.73        | 0.73          |
| 0          | 0.67           | 0.67        | 0.67          |
| 15         | 0.51           | 0.11        | 0.21          |
| 30         | 0.33           | 0.07        | 0.14          |
| 45         | 0.19           | 0           | 0.07          |
| 60         | 0.13           | 0           | 0             |
| 90         | 0              | 0           | 0             |
